# Supplementary material
Source: bioRxiv or medRxiv preprint supplement (https://www.biorxiv.org/highwire/filestream/27111/field_highwire_adjunct_files/0/095851-1.pdf)
Supplement: Supplementary file [file 095851-1.pdf]

# Appendices S1-S5 for “The coefficient of determination $R^2$ and intra-class correlation ICC from generalized linear-mixed effects models revised and expanded”

Shinichi Nakagawa  
Holger Schielzeth

University of New South Wales, Sydney, Australia  
Friedrich Schiller University Jena, Germany

21 December 2016

## Appendix S1

### Deriving the observation-level variance $\sigma_\varepsilon^2$ using log-normal approximation for the negative binomial distribution with log link

Here, we only deal with the case of the negative binomial distribution, but this derivation process is directly applicable to the quasi-Poisson and gamma distributions with log link. Given a random variable  $x$  is negative binomially distributed, the mean and variance of  $x$  is respectively:

$$E[x] = \lambda$$
$$\text{var}[x] = \lambda + \frac{\lambda^2}{\theta}$$

where  $\lambda$  and  $\theta$  as in Table 1. When the distribution of  $\ln(x)$  follows the natural logarithm of a log-normal distribution. Then, the variance of  $\ln(x)$  is:

$$\text{var}[\ln(x)] = \ln\left(1 + \frac{\text{var}[x]}{E[x]^2}\right)$$

Therefore:

$$\text{var}[\ln(x)] = \ln\left(1 + \frac{\lambda + \lambda^2/\theta}{\lambda^2}\right)$$

By rearranging, we obtain:

$$\text{var}[\ln(x)] = \ln\left(1 + \frac{1}{\lambda} + \frac{1}{\theta}\right)$$

which is the observation-level variance for the negative binomial distribution with the log link function, using the log-normal approximation.

## Appendix S2

### Comparison of the three methods for obtaining the observation-level variance $\sigma_d$ for the Poisson distribution

We plot three different methods for obtaining the observation-level variance (formally we referred this as the distribution-specific variance for Poisson; for details of this, see Appendix S4). Before we start this, we load packages, which we need for the calculations:

```
# install.packages('latex2exp') # install it if you do not have this
library(latex2exp) # enable to use LaTeX in R expression
# install.packages('extremevalues')
library(extremevalues) # this may be not needed

## Error: package or namespace load failed for 'extremevalues'

# install.packages('numDeriv')
library(numDeriv) # we need a numerical method for getting derivatives of probit
```

Make sure you have installed and loaded all these packages to your current R session.

```
lnX <- seq(-20, 3, by = 0.001)
X <- exp(lnX)
plot(X, 1/X, type = "l", lty = "dotted", ylab = "Observation-level variance",
     xlab = TeX("$\\lambda$"), ylim = c(0, 10))
lines(X, log(1 + 1/X))
lines(X, trigamma(X), lty = "dashed")
legend(15, 10, c(TeX("$\\frac{1}{\\lambda}$"), TeX("$\\ln\\left(1+\\frac{1}{\\lambda}\\right)$"),
               TeX("$\\psi_1(\\lambda)$")), lty = c(3, 1, 2), bty = "n")
```

As you see, these three functions seem to converge for values larger than about 2 (Figure 1). Now we zoom into this figure.

```
plot(X, 1/X, type = "l", lty = "dotted", ylab = "Observation-level variance",
     xlab = TeX("$\\lambda$"), ylim = c(0, 10), xlim = c(0, 3))
lines(X, log(1 + 1/X))
lines(X, trigamma(X), lty = "dashed")
legend(2, 10, c(TeX("$\\frac{1}{\\lambda}$"), TeX("$\\ln\\left(1+\\frac{1}{\\lambda}\\right)$"),
               TeX("$\\psi_1(\\lambda)$")), lty = c(3, 1, 2), bty = "n")
```

We see substantial divergence among the three functions at small values of  $\lambda$  (Figure 2). Therefore, it is important to report which method is used when calculating  $R_{\text{GLMM}}^2$  and  $\text{ICC}_{\text{GLMM}}$ , especially with small  $\lambda$ . Also, it makes sense that the observation-level variance increases rather quickly with smaller means ( $\lambda$  values) because many groups (or individuals) have very similar outcomes (for example, with  $\lambda = 0.1$ , around 90% of the outcome will be 0 and the rest will be either mostly 1 or 2).

Incidentally, we can obtain the delta method version of  $\sigma_d$  using the R function `D`, without having to do derivations by hand!

```
FunX <- expression(log(X)) # function of X
DXFunX <- D(FunX, "X") # getting a derivative with respect to X
DXFunX # this is 1/lambda and lambda*(1/lambda)^2 will be 1/lambda
```

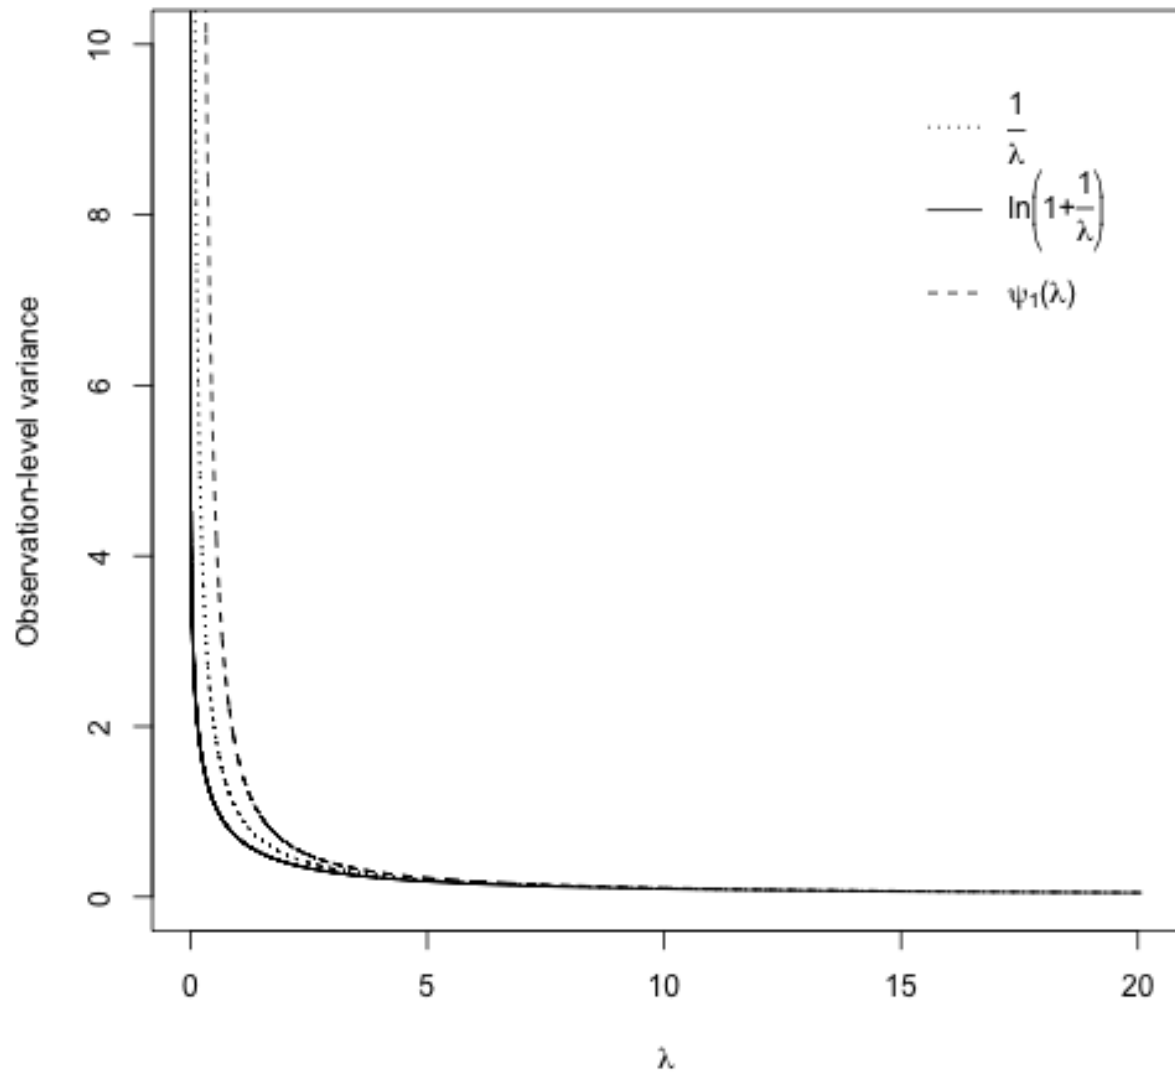

Figure 1: A comparison of the three observation-level variance functions

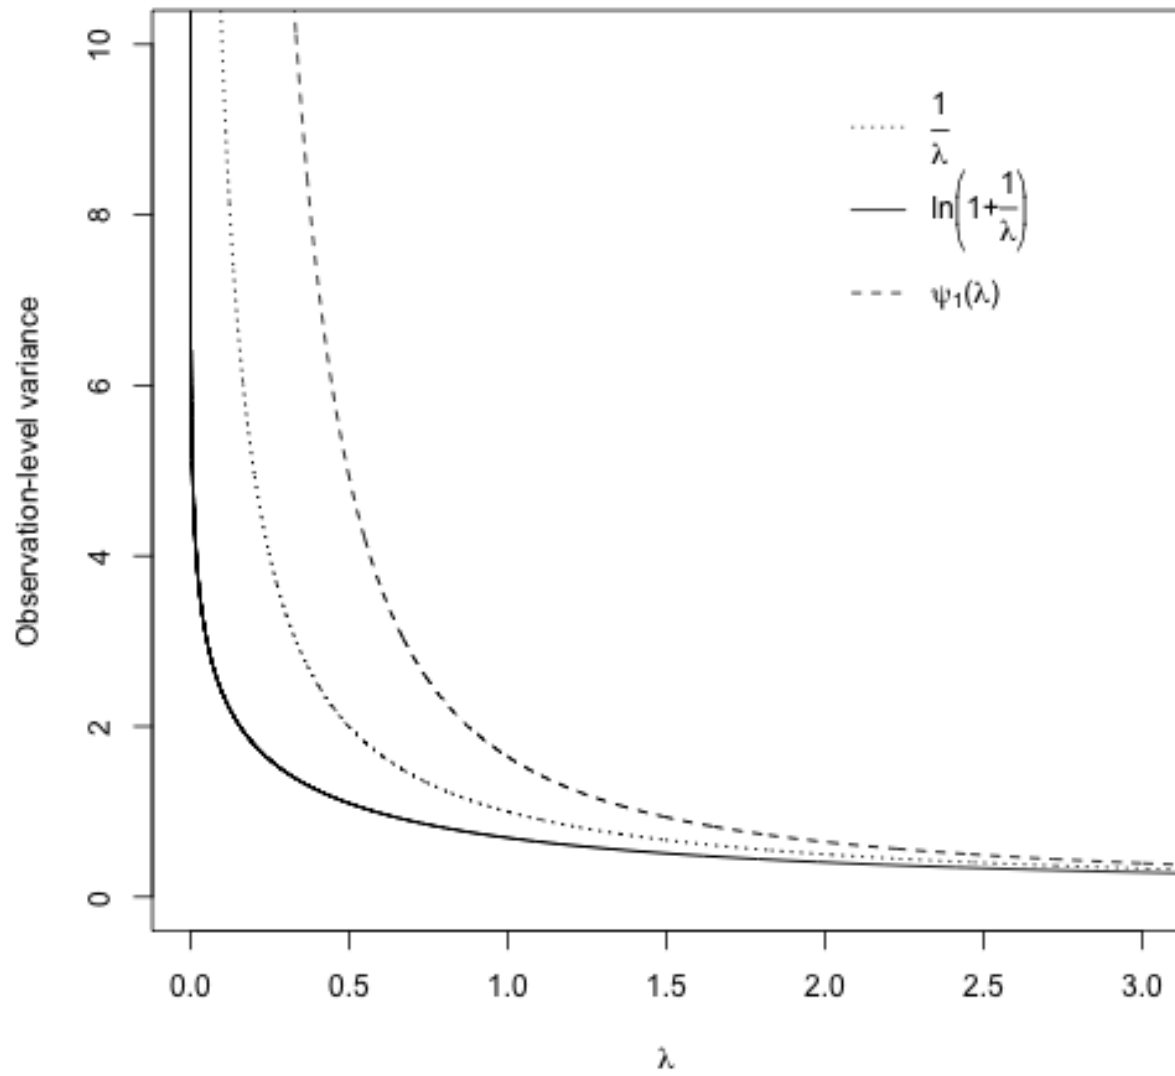

Figure 2: A comparison of the three observation-level variance functions zoomed in

```
## 1/X

# the delta method for variance approximation (Delta 1)
VarOd <- X * eval(DXFunX)^2
plot(X, 1/X, type = "l", lty = "dotted", ylab = "Observation-level variance",
      xlab = TeX("$\\lambda$"), lwd = 4, ylim = c(0, 10), xlim = c(0, 3))
points(X, VarOd, type = "l", lty = "dashed", col = "red", lwd = 2)
legend(1.5, 10, c(TeX("$\\frac{1}{\\lambda}$"), "", "D function in R"), lty = c(3,
  0, 2), col = c("black", "black", "red"), bty = "n", )
```

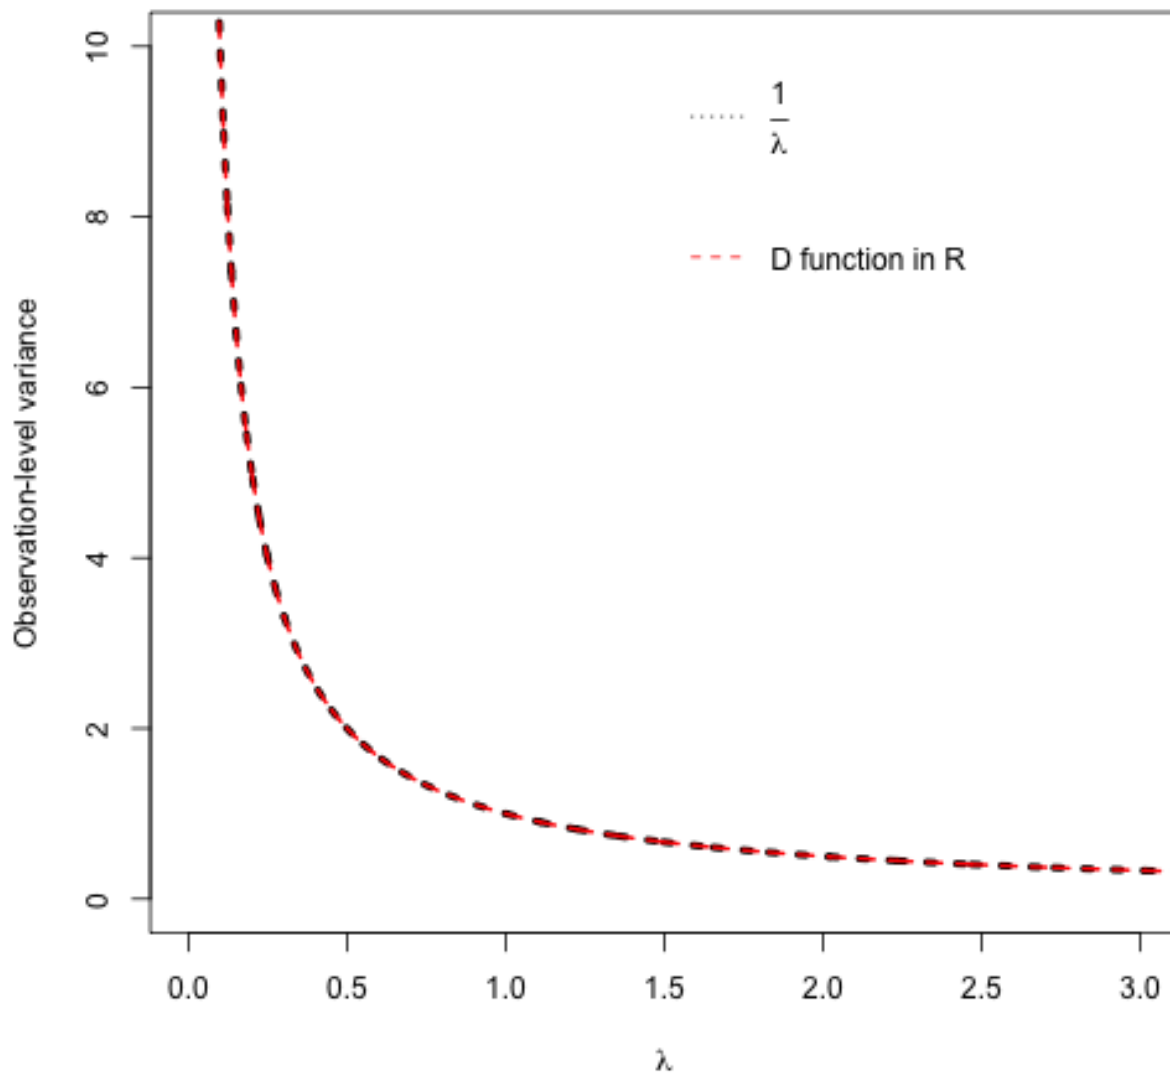

Figure 3: A comparison of alternative approaches for applying the delta method

There is an exact match between the results from the delta method and the delta method outcome `VarOd` as both are  $\frac{1}{X}$  ( $1/X$ ).

It is also very important to note that when  $\frac{1}{\lambda}$  (Poisson distributions),  $\frac{1}{\lambda} + \frac{1}{\theta}$  (negative-binomial distributions) or  $\frac{1}{\nu}$  (gamma distributions) are under 0.5, estimated the observation-level variance  $\sigma_\varepsilon$  from the three methods can be noticeable different. This can also be seen in the worked examples (Appendix S6). Our recommendation is to use the traigamma function approach, which we did in our worked examples.

## Appendix S3

### Looking into the performance of the delta method for bias corrections

Below we compare the exact mean (Equation 32) and the approximated mean (Equation 35) under 3 different variance values ( $\sigma_\tau^2 = 0.25, 0.5$  and  $1$ ) with Poisson (count) data.

```
Beta <- seq(-4, 4, by = 0.05)
VarQuarter <- 0.25
VarHalf <- 0.5
VarOne <- 1

FunB1 <- expression(exp(Beta)) # inverse of log or exp
DBFunB1 <- D(FunB1, "Beta") # taking derivative of FunB1

lnExactQuarter <- exp(Beta + 0.5 * VarQuarter) # Equation 32
lnApproxQuarter <- exp(Beta) + 0.5 * VarQuarter * eval(DBFunB1) # Equation 35
lnExactHalf <- exp(Beta + 0.5 * VarHalf) # Equation 32
lnApproxHalf <- exp(Beta) + 0.5 * VarHalf * eval(DBFunB1) # Equation 35
lnExactOne <- exp(Beta + 0.5 * VarOne) # Equation 32
lnApproxOne <- exp(Beta) + 0.5 * VarOne * eval(DBFunB1) # Equation 35

plot(lnExactQuarter, lnApproxQuarter, type = "l", ylab = "Approximated mean by the delta method",
      xlab = "Exact mean", xlim = c(0, 20), ylim = c(0, 20))
lines(lnExactHalf, lnApproxHalf, lty = 2)
lines(lnExactOne, lnApproxOne, lty = 3)
abline(0, 1, col = "red")
legend(0, 20, c(TeX("$\\sigma^2_{\\tau} = 0.25$"), TeX("$\\sigma^2_{\\tau} = 0.5$"),
               TeX("$\\sigma^2_{\\tau} = 1$")), lty = c(1, 2, 3), bty = "n")
```

As one can see, the delta method approximation starts to perform worse with larger mean values and also larger variance values.

Now we look at the performance of two approximations of mean values (Equations 40 & 41); we can use Equation 40 as the delta approximation while Equation 41 as the normal approximation because this approximation uses the similarity between the logistic distribution and the normal distribution (see Equation 42). Note that in this case (proportion data with the logit link), we have to use simulation to obtain correct mean values.

```
Beta <- seq(-10, 10, by = 0.05)
FunB2 <- expression(exp(Beta)/(1 + exp(Beta)))
DBDBFunB2 <- D(D(FunB2, "Beta"), "Beta") # taking derivative of FunB2 twice

# getting unbiased means using simulations
logitSimQuarter <- logitSimHalf <- logitSimOne <- 1:length(Beta)
for (i in 1:length(Beta)) {
  logitSimQuarter[i] <- mean(plogis(Beta[i] + rnorm(1e+06, 0, sqrt(VarQuarter))))
```

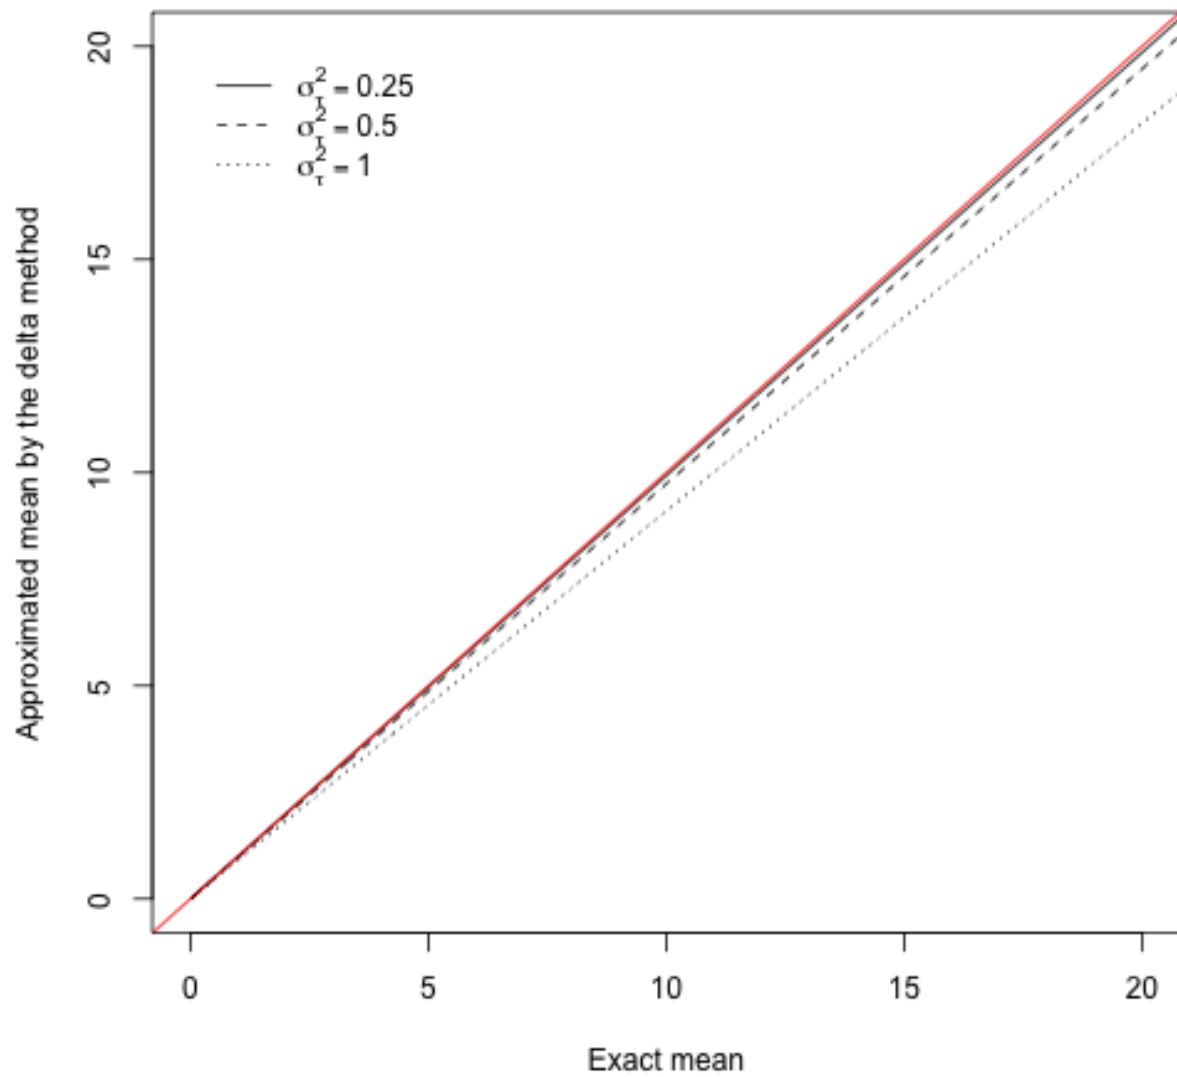

Figure 4: Performance of approximations (black) against unbiased line for Poisson (count) data with the log-link

```

logitSimHalf[i] <- mean(plogis(Beta[i] + rnorm(1e+06, 0, sqrt(VarHalf))))
logitSimOne[i] <- mean(plogis(Beta[i] + rnorm(1e+06, 0, sqrt(VarOne))))
}

logitApprox1Quarter <- eval(FunB2) + 0.5 * VarQuarter * eval(DBDBFunB2) # equivalent to Equation 38
logitApprox2Quarter <- plogis(Beta/sqrt(1 + ((16 * sqrt(3))/(15 * pi))^2 * VarQuarter))
logitApprox1Half <- eval(FunB2) + 0.5 * VarHalf * eval(DBDBFunB2) # equivalent to Equation 38
logitApprox2Half <- plogis(Beta/sqrt(1 + ((16 * sqrt(3))/(15 * pi))^2 * VarHalf))
logitApprox1One <- eval(FunB2) + 0.5 * VarOne * eval(DBDBFunB2) # equivalent to Equation 38
logitApprox2One <- plogis(Beta/sqrt(1 + ((16 * sqrt(3))/(15 * pi))^2 * VarOne))

plot(logitSimQuarter, logitApprox1Quarter, type = "l", ylab = "Approximated mean by the two methods",
      xlab = "Simulated mean (unbiased)")
lines(logitSimHalf, logitApprox1Half, lty = 2)
lines(logitSimOne, logitApprox1One, lty = 3)
lines(logitSimQuarter, logitApprox2Quarter, lty = 1, col = "blue")
lines(logitSimHalf, logitApprox2Half, lty = 2, col = "blue")
lines(logitSimOne, logitApprox2One, lty = 3, col = "blue")
abline(0, 1, col = "red")
legend(0, 1, c(TeX("$\\sigma^2_{\\tau} = 0.25 (delta)"), TeX("$\\sigma^2_{\\tau} = 0.5 (delta)"),
              TeX("$\\sigma^2_{\\tau} = 1 (delta)"), TeX("$\\sigma^2_{\\tau} = 0.25 (normal)"),
              TeX("$\\sigma^2_{\\tau} = 0.5 (normal)"), TeX("$\\sigma^2_{\\tau} = 1 (normal)")),
      lty = c(1, 2, 3, 1, 2, 3), col = c(rep(c("black", "blue"), each = 3)), bty = "n")

```

The corresponding figure for this is hard to see differences between the two methods so we zoom in apart from deviations occur most at around 0.3 and 0.7.

```

plot(logitSimQuarter, logitApprox1Quarter, type = "l", ylab = "Approximated mean by the two methods",
      xlab = "Simulated mean (unbiased)", xlim = c(0.65, 0.75), ylim = c(0.65,
      0.75))
lines(logitSimHalf, logitApprox1Half, lty = 2)
lines(logitSimOne, logitApprox1One, lty = 3)
lines(logitSimQuarter, logitApprox2Quarter, lty = 1, col = "blue")
lines(logitSimHalf, logitApprox2Half, lty = 2, col = "blue")
lines(logitSimOne, logitApprox2One, lty = 3, col = "blue")
abline(0, 1, col = "red")
legend(0.65, 0.75, c(TeX("$\\sigma^2_{\\tau} = 0.25 (delta)"), TeX("$\\sigma^2_{\\tau} = 0.5 (delta)"),
                    TeX("$\\sigma^2_{\\tau} = 1 (delta)"), TeX("$\\sigma^2_{\\tau} = 0.25 (normal)"),
                    TeX("$\\sigma^2_{\\tau} = 0.5 (normal)"), TeX("$\\sigma^2_{\\tau} = 1 (normal)")),
      lty = c(1, 2, 3, 1, 2, 3), col = c(rep(c("black", "blue"), each = 3)), bty = "n")

```

Now we can see interesting results. In the case of  $\sigma_{\tau}^2 = 0.25$ , the delta method is less biased, when  $\sigma_{\tau}^2 = 0.5$ , the delta method is still slightly better but when  $\sigma_{\tau}^2 = 1$ , the normal approximation is much better.

## Appendix S4

### Why $R_{\text{GLMM}}^2$ and $\text{ICC}_{\text{GLMM}}$ using variances on the latent scale are estimated on the data/original scale

Here, we use  $R_{\text{GLMM}}^2$  and  $\text{ICC}_{\text{GLMM}}$  as calculated using the ‘delta-method-based’ observation-level variance. Marginal  $R_{\text{GLMM}}^2$  from a quasi-Poisson GLMM (model 2 in the main text) using the variance components and the observation-level variance (note both are on the latent scale) can be expressed as:



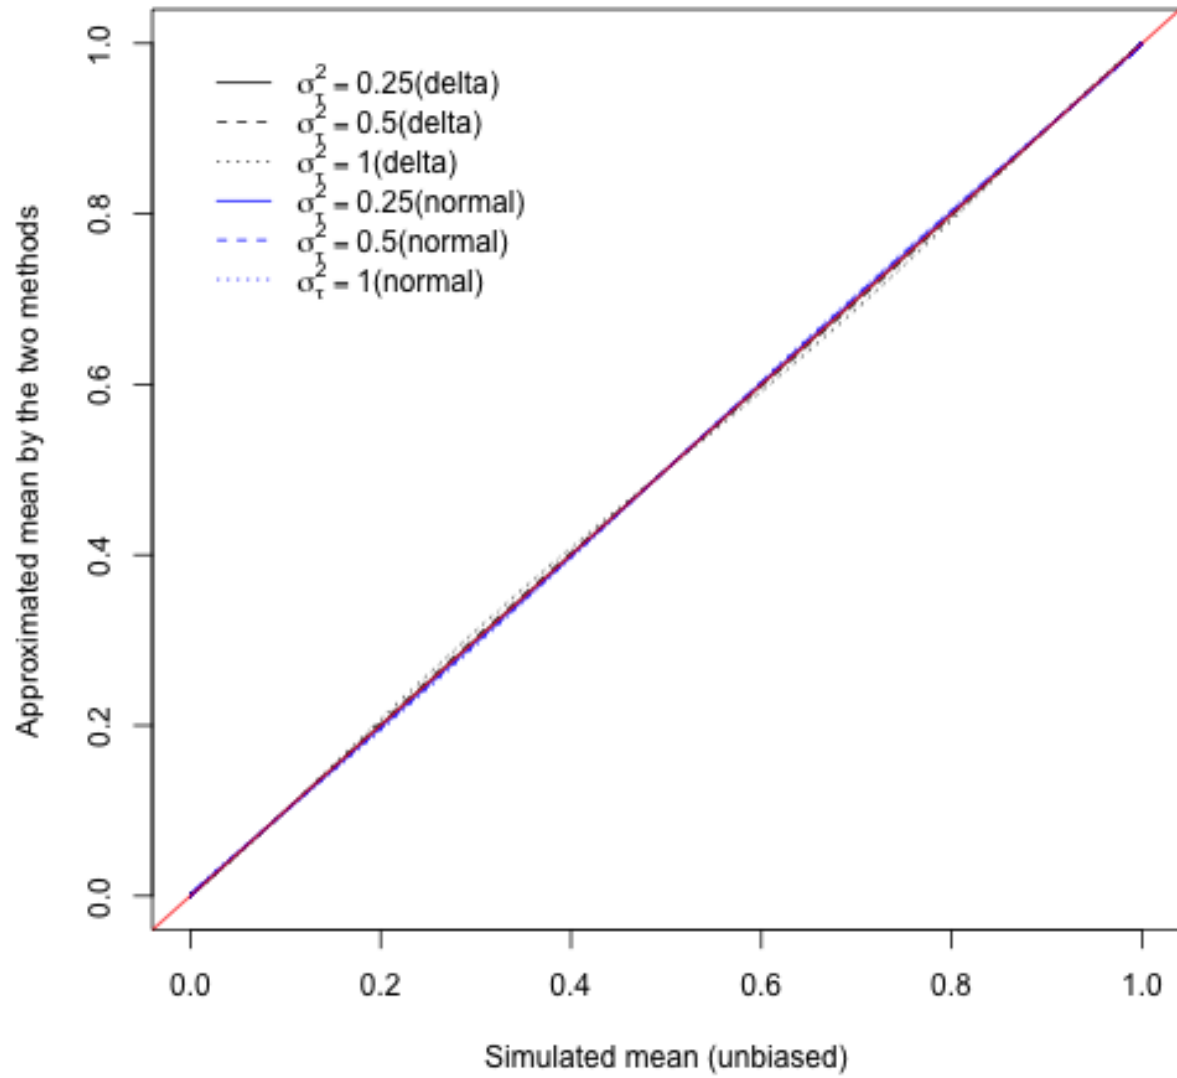

Figure 5: Performance of approximations (black) against unbiased line for binomial data with the logit-link

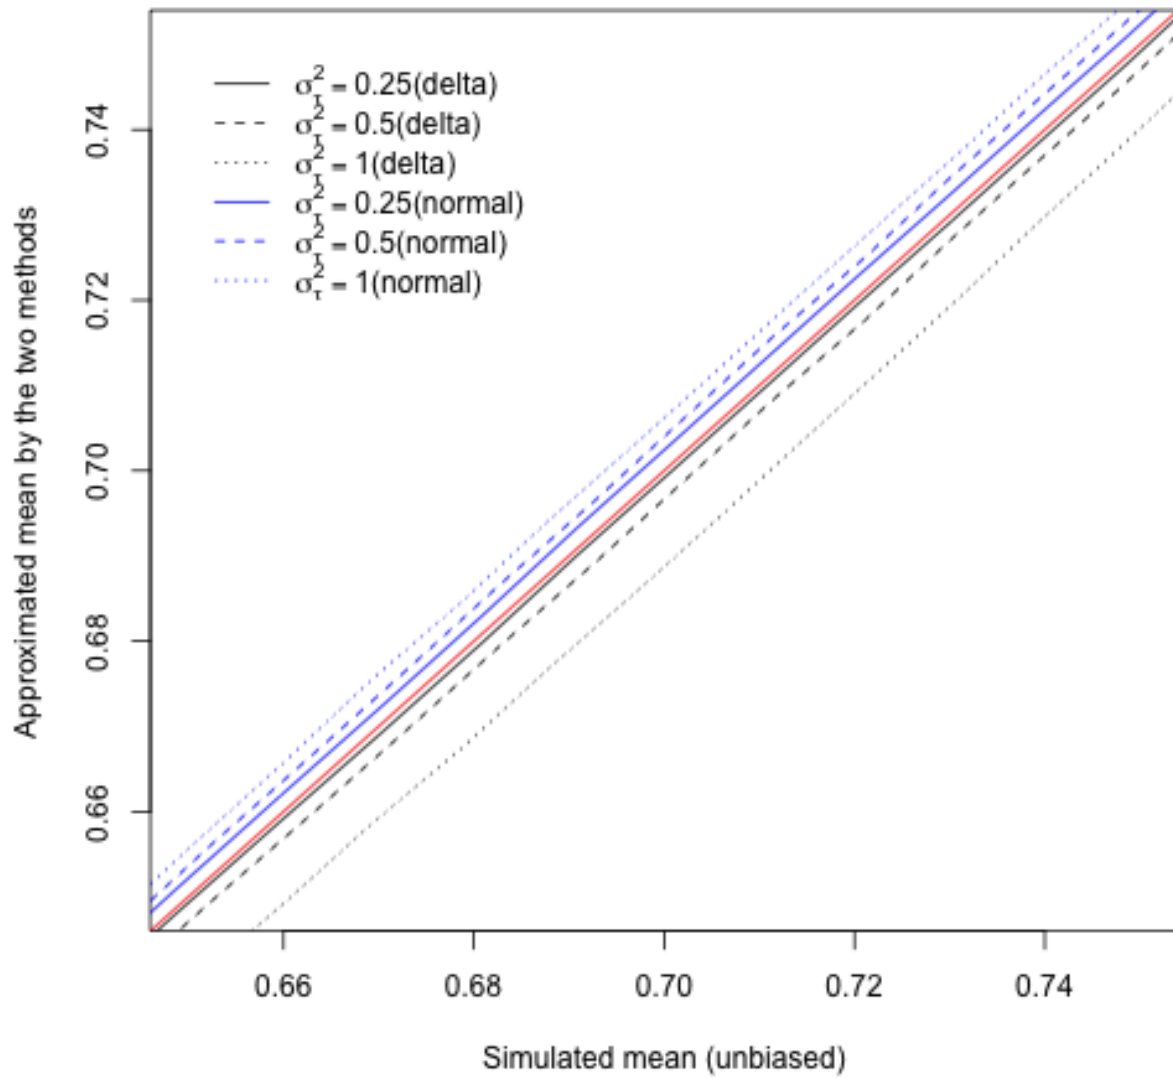

Figure 6: Zooming in on the performance of approximations (black) against unbiased line for binomial data with the logit-link

$$R_{\text{OP}-\ln(m)}^2 = \frac{\sigma_f^2}{\sigma_f^2 + \sigma_\alpha^2 + \sigma_o^2}$$

By applying the delta method for variance approximation, we can approximate  $R_{\text{GLMM}}^2$  on the data/original scale can be written as:

$$R_{\text{OP}-\ln(m)}^{2*} \approx \frac{\sigma_f^2 \left( \frac{dg(\beta_0)}{d\beta_0} \right)^2}{(\sigma_f^2 + \sigma_\alpha^2 + \sigma_o^2) \left( \frac{dg(\beta_0)}{d\beta_0} \right)^2}$$

where  $g$  is the transformation function (inverse link function).

By simplifying this, we obtain:

$$R_{\text{OP}-\ln(m)}^{2*} \approx \frac{\sigma_f^2}{\sigma_f^2 + \sigma_\alpha^2 + \sigma_o^2} = R_{\text{OP}-\ln(m)}^2$$

This argument above is directly transferable to  $\text{ICC}_{\text{GLMM}}$  and to other non-Gaussian distributions. Thus,  $R_{\text{GLMM}}^2$  and  $\text{ICC}_{\text{GLMM}}$  using variances on the latent scale approximates to  $R_{\text{GLMM}}^2$  and  $\text{ICC}_{\text{GLMM}}$  on data/original scale. Also, this implies that ICC on the data/original scale can be written by using the binomial GLMM (model 6):

$$\text{ICC}_{\text{binom-logit}*} \approx \frac{\sigma_\alpha^2 p^2 / (1 + e^b)^2}{(\sigma_\alpha^2 + \sigma_e^2) p^2 / (1 + e^b)^2 + p(1 - p)}$$

where  $p$  is the mean on the data scale and  $b$  is the corresponding value on the latent scale and  $p = e^b / (1 + e^b)$ ; this was first derived in Browne et al. (2005, *J. R. Statistic. Soc. A.*, 168: 599-613) using the delta method. An ICC can be approximated by using the delta method and then, the observation-level  $\sigma_e^2$  for the binomial distribution with the logit link (based on the delta method) is  $1/p(1 - p)$  (see Table 2):

$$\text{ICC}_{\text{binom-logit}} \approx \frac{\sigma_\alpha^2}{\sigma_\alpha^2 + \sigma_e^2 + 1/p(1 - p)}$$

Given  $p = e^b / (1 + e^b)$ ,  $p(1 - p) = e^b / (1 + e^b)^2$  and also  $e^b = p / (1 - p)$  and therefore,  $(1 + e^b)^2 = 1 / (1 - p)^2$ . By using this, ICC on the data scale can be re-written as:

$$\text{ICC}_{\text{binom-logit}*} \approx \frac{\sigma_\alpha^2 p^2 (1 - p)^2}{(\sigma_\alpha^2 + \sigma_e^2) p^2 (1 - p)^2 + p(1 - p)}$$

By dividing both the numerator and denominator by  $p^2(1 - p)^2$ , we have:

$$\text{ICC}_{\text{binom-logit}*} \approx \frac{\sigma_\alpha^2}{\sigma_\alpha^2 + \sigma_e^2 + 1/p(1 - p)}$$

This is the same as the ICC formula above.

## Appendix S5

### Comparing the distribution-specific and observation-level variance for the three common link functions of the binomial distribution

We plot how the ‘delta-method-based’ observation-level variance change as  $p$  (probability; `Prob`) changes for the logit, probit and complementary log-log link function along with the corresponding ‘theoretical’ distribution-specific variance.

```
Prob <- seq(1e-04, 0.9999, by = 1e-04)
FunPlogit <- expression(log(Prob/(1 - Prob))) # logit
FunPcclog <- expression(log(-log(1 - Prob))) # c-c log

DPFunPlogit <- D(FunPlogit, "Prob") # derivative of logit
DPFunPcclog <- D(FunPcclog, "Prob") # derivative of cclog
# the delta method for variance approximation
VarOlogit <- Prob * (1 - Prob) * eval(DPFunPlogit)^2
# VarDlogit <- 1/(Prob*(1-Prob)) # as in Table 3 - equivalent as above the
# delta method (note some differences from the others)
VarOprobit <- Prob * (1 - Prob) * grad(qnorm, Prob)^2
# VarDprobit <- 2*pi*Prob*(1-Prob)*(exp((invErf(2*Prob-1))^2))^2 # as in Table
# 3 - equivalent as above the delta method
VarOcclog <- Prob * (1 - Prob) * eval(DPFunPcclog)^2
# VarDcclog <- Prob/((log(1-Prob))^2*(1-Prob)) # as in Table 3 - equivalent as
# above
```

Above, the delta method for variance approximation was used in this part. Note that for the probit function, we had to use the numerical approach (`numDeriv` package) rather than the default `D` function. However, these functions listed in Table 3 can be directly used; they will produce the same results.

```
plot(Prob, VarOlogit, type = "l", ylab = "Variance", xlab = "Probability", ylim = c(0,
  20))
lines(Prob, VarOprobit, col = "red")
lines(Prob, VarOcclog, col = "blue")
abline(pi^2/3, 0, lty = "dashed")
abline(1, 0, lty = "dashed", col = "red")
abline(pi^2/6, 0, lty = "dashed", col = "blue")
legend(0.5, 20, c("Logit (link)", "Logit (latent)", "Probit (link)", "Probit (latent)",
  "CClog(link)", "CClog(latent)"), lty = c(1, 2, 1, 2, 1, 2), col = rep(c("black",
  "red", "blue"), each = 2), bty = "n")
```

As becomes clear from the corresponding figure, observation-level variance is always larger than distribution-specific variance apart from the case of complementary-complementary (c-c) log link. It may not be surprising to see the observation-level variances increase at both extreme (0 and 1) because the total variance decreases and uncertainty increases closer near 0 and 1.

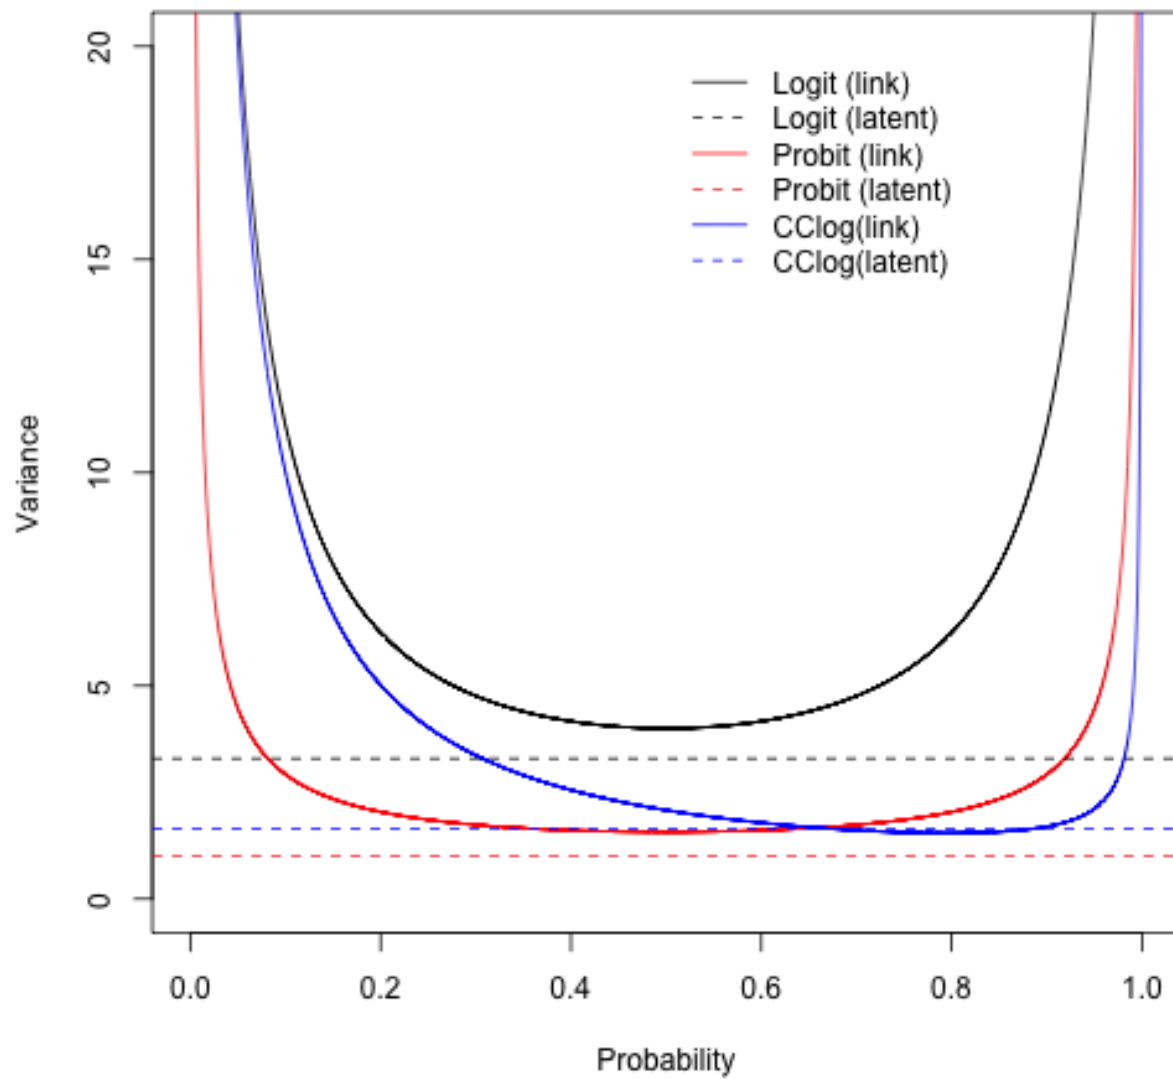

Figure 7: A comparison of distribution-specific and observation-level variances for the 3 common link functions
